# Supplementary material
Source: publisher figshare collection journal article supplement (https://gsajournals.figshare.com/ndownloader/files/11309420)
Supplement: Supplementary file 1 [file 11309420]

## Sheet: Sheet1
Table S3. Summary of all detected events by mouse host and by chromosome
		chromosome missegregation															crossover-associated
			whole Chr LOH			whole chromosome aneuploidy								ploidy status (chromosome)			SGM LOH						prior crossover		copy number variation
	Chr	total	total	A	B	Total	1A	3A, 4A	2A1B/3A1B	2A2B	1A2B/1A3B	3B	1B	1N	3N	4N	total	A	B	XOs	GC	BIR	whole Chr aneuploidy	whole Chr LOH	amplification	truncation	internal deletion
ALL	Chr1	99	81	81	0	18	10	8	0	0	0	0	0	10	7	1	186	168	17	213	34	149	0	0	0	0	3
N = 429	Chr2	44	28	18	10	16	4	0	2	0	4	0	6	10	6	0	4	3	1	5	1	3	0	0	1	0	0
	Chr3	52	41	11	30	11	0	0	0	0	1	0	10	10	1	0	2	0	2	3	1	1	0	0	0	0	0
	Chr4	32	8	8	0	24	9	1	8	3	3	0	0	9	12	3	13	3	14	21	0	17	4	2	0	0	0
	Chr5	40	6	5	1	34	7	0	13	0	11	0	3	10	24	0	10	7	3	15	2	8	1	0	1	1	0
	Chr6	87	4	4	0	83	5	2	15	4	57	0	0	5	72	6	5	0	5	21	0	5	13	0	2	1	0
	Chr7	24	5	5	0	19	5	1	7	2	4	0	0	5	12	2	1	1	0	1	0	1	0	0	0	0	0
	ChrR	45	22	15	7	23	10	1	5	0	7	0	0	10	13	0	10	7	3	19	3	8	2	0	0	4	0
D2M3	Chr1	3	3	3	0	0	0	0	0	0	0	0	0	0	0	0	25	21	4	31	8	17	0	0	0	0	1
N=34	Chr2	0	0	0	0	0	0	0	0	0	0	0	0	0	0	0	0	0	0	0	0	0	0	0	0	0	0
	Chr3	3	3	0	3	0	0	0	0	0	0	0	0	0	0	0	0	0	0	0	0	0	0	0	0	0	0
	Chr4	0	0	0	0	0	0	0	0	0	0	0	0	0	0	0	0	0	0	0	0	0	0	0	0	0	0
	Chr5	1	0	0	0	1	0	0	1	0	0	0	0	0	1	0	0	0	0	0	0	0	0	0	0	0	0
	Chr6	4	0	0	0	4	0	0	1	0	3	0	0	0	4	0	0	0	0	0	0	0	0	0	0	0	0
	Chr7	0	0	0	0	0	0	0	0	0	0	0	0	0	0	0	0	0	0	0	0	0	0	0	0	0	0
	ChrR	0	0	0	0	0	0	0	0	0	0	0	0	0	0	0	0	0	0	0	0	0	0	0	0	0	0
D3M1	Chr1	13	10	10	0	3	2	1	0	0	0	0	0	2	1	0	15	13	2	18	4	11	0	0	0	0	0
N=38	Chr2	8	5	4	1	3	0	0	0	0	1	0	2	2	1	0	0	0	0	0	0	0	0	0	0	0	0
	Chr3	16	14	5	9	2	0	0	0	0	0	0	2	2	0	0	0	0	0	0	0	0	0	0	0	0	0
	Chr4	3	0	0	0	3	2	0	1	0	0	0	0	2	1	0	0	0	0	1	0	0	3	0	0	0	0
	Chr5	7	1	1	0	6	2	0	4	0	0	0	0	2	4	0	4	2	2	5	1	3	0	0	0	0	0
	Chr6	11	0	0	0	11	2	0	4	0	5	0	0	2	9	0	1	0	1	3	0	1	0	0	2	0	0
	Chr7	6	1	1	0	5	2	0	2	0	1	0	0	2	3	0	0	0	0	0	0	0	0	0	0	0	0
	ChrR	5	1	0	1	4	2	0	1	0	1	0	0	2	2	0	4	2	2	6	2	2	0	0	0	1	0
D3M3	Chr1	5	5	5	0	0	0	0	0	0	0	0	0	0	0	0	24	22	2	26	3	20	0	0	0	0	0
N=38	Chr2	2	1	1	0	1	0	0	1	0	0	0	0	0	1	0	0	0	0	0	0	0	0	0	0	0	0
	Chr3	3	3	0	3	0	0	0	0	0	0	0	0	0	0	0	0	0	0	0	0	0	0	0	0	0	0
	Chr4	2	0	0	0	2	0	0	1	1	0	0	0	0	1	1	0	0	0	0	0	0	0	0	0	0	0
	Chr5	2	1	0	1	1	0	0	0	0	1	0	0	0	1	0	0	0	0	0	0	0	0	0	0	0	0
	Chr6	5	0	0	0	5	0	0	2	1	2	0	0	0	4	1	0	0	0	0	0	0	0	0	0	0	0
	Chr7	2	0	0	0	2	0	0	1	1	0	0	0	0	1	1	0	0	0	0	0	0	0	0	0	0	0
	ChrR	2	1	1	0	1	0	0	0	0	1	0	0	0	1	0	0	0	0	1	0	0	0	0	0	1	0
D3M2	Chr1	15	12	12	0	3	2	1	0	0	0	0	0	2	1	0	17	17	0	18	1	16	0	0	0	0	0
N=44	Chr2	7	5	4	1	2	2	0	0	0	0	0	0	2	0	0	0	0	0	0	0	0	0	0	0	0	0
	Chr3	9	7	2	5	2	0	0	0	0	0	0	2	2	0	0	1	0	1	1	0	1	0	0	0	0	0
	Chr4	5	0	0	0	5	2	0	1	1	1	0	0	2	2	1	2	0	2	2	0	2	0	0	0	0	0
	Chr5	5	2	2	0	3	0	0	1	0	1	0	1	1	2	0	2	2	0	2	0	2	0	0	0	0	0
	Chr6	9	0	0	0	9	0	1	1	1	6	0	0	0	8	1	0	0	0	0	0	0	0	0	0	0	0
	Chr7	2	1	1	0	1	0	0	1	0	0	0	0	0	1	0	0	0	0	0	0	0	0	0	0	0	0
	ChrR	6	4	3	1	2	2	0	0	0	0	0	0	2	0	0	1	1	0	1	0	1	0	0	0	0	0
D3M5	Chr1	6	5	5	0	1	1	0	0	0	0	0	0	1	0	0	30	27	3	33	6	23	0	0	0	0	0
N=47	Chr2	8	6	4	2	2	0	0	1	0	0	0	1	1	1	0	1	0	1	1	0	1	0	0	0	0	0
	Chr3	3	2	2	0	1	0	0	0	0	0	0	1	1	0	0	0	0	0	0	0	0	0	0	0	0	0
	Chr4	3	1	1	0	2	0	0	1	1	0	0	0	0	1	1	1	1	0	1	0	1	0	0	0	0	0
	Chr5	2	1	1	0	1	1	0	0	0	0	0	0	1	0	0	0	0	0	0	0	0	0	0	0	0	0
	Chr6	5	2	2	0	3	0	0	0	1	2	0	0	0	2	1	1	0	1	1	0	1	0	0	0	0	0
	Chr7	2	0	0	0	2	0	0	1	1	0	0	0	0	1	1	0	0	0	0	0	0	0	0	0	0	0
	ChrR	3	2	1	1	1	1	0	0	0	0	0	0	1	0	0	1	1	0	1	0	1	0	0	0	0	0
D5M4	Chr1	2	2	2	0	0	0	0	0	0	0	0	0	0	0	0	13	10	3	12	3	9	0	0	0	0	0
N=16	Chr2	1	1	0	1	0	0	0	0	0	0	0	0	0	0	0	0	0	0	0	0	0	0	0	0	0	0
	Chr3	1	1	0	1	0	0	0	0	0	0	0	0	0	0	0	0	0	0	0	0	0	0	0	0	0	0
	Chr4	0	0	0	0	0	0	0	0	0	0	0	0	0	0	0	0	0	0	0	0	0	0	0	0	0	0
	Chr5	1	0	0	0	1	0	0	1	0	0	0	0	0	1	0	0	0	0	0	0	0	0	0	0	0	0
	Chr6	2	0	0	0	2	0	0	1	0	1	0	0	0	2	0	0	0	0	0	0	0	0	0	0	0	0
	Chr7	1	0	0	0	1	0	0	0	0	1	0	0	0	1	0	0	0	0	0	0	0	0	0	0	0	0
	ChrR	0	0	0	0	0	0	0	0	0	0	0	0	0	0	0	0	0	0	0	0	0	0	0	0	0	0
D5M2	Chr1	21	18	18	0	3	1	2	0	0	0	0	0	1	1	1	7	7	0	7	0	7	0	0	0	0	0
N=39	Chr2	8	4	3	1	4	0	0	0	0	3	0	1	1	3	0	3	3	0	4	1	2	0	0	1	0	0
	Chr3	6	4	0	4	2	0	0	0	0	1	0	1	1	1	0	0	0	0	0	0	0	0	0	0	0	0
	Chr4	7	4	4	0	3	1	1	1	0	0	0	0	1	2	0	2	0	6	8	0	6	0	2	0	0	0
	Chr5	9	0	0	0	9	2	0	2	0	4	0	1	3	6	0	2	1	1	4	0	2	1	0	1	0	0
	Chr6	13	0	0	0	13	1	1	2	0	9	0	0	1	12	0	0	0	0	2	0	0	2	0	0	0	0
	Chr7	4	2	2	0	2	1	0	0	0	1	0	0	1	1	0	0	0	0	0	0	0	0	0	0	0	0
	ChrR	6	4	3	1	2	1	1	0	0	0	0	0	1	1	0	0	0	0	1	0	0	0	0	0	1	0
D5M3	Chr1	23	20	20	0	3	1	2	0	0	0	0	0	1	2	0	22	18	3	23	4	17	0	0	0	0	0
N=67	Chr2	6	5	2	3	1	0	0	0	0	0	0	1	1	0	0	0	0	0	0	0	0	0	0	0	0	0
	Chr3	4	3	1	2	1	0	0	0	0	0	0	1	1	0	0	0	0	0	0	0	0	0	0	0	0	0
	Chr4	4	1	1	0	3	1	0	1	0	1	0	0	1	2	0	8	2	6	8	0	8	0	0	0	0	0
	Chr5	5	0	0	0	5	1	0	2	0	2	0	0	1	4	0	2	2	0	4	1	1	0	0	0	1	0
	Chr6	31	0	0	0	31	1	0	5	0	25	0	0	1	30	0	2	0	2	14	0	2	11	0	0	1	0
	Chr7	3	0	0	0	3	1	1	1	0	0	0	0	1	2	0	1	1	0	1	0	1	0	0	0	0	0
	ChrR	7	3	2	1	4	1	0	2	0	1	0	0	1	3	0	1	1	0	1	0	1	0	0	0	0	0
D1M1	Chr1	2	2	2	0	0	0	0	0	0	0	0	0	0	0	0	9	8	1	12	1	8	0	0	0	0	1
N=12	Chr2	0	0	0	0	0	0	0	0	0	0	0	0	0	0	0	0	0	0	0	0	0	0	0	0	0	0
	Chr3	0	0	0	0	0	0	0	0	0	0	0	0	0	0	0	1	0	1	2	1	0	0	0	0	0	0
	Chr4	0	0	0	0	0	0	0	0	0	0	0	0	0	0	0	0	0	0	0	0	0	0	0	0	0	0
	Chr5	1	0	0	0	1	0	0	1	0	0	0	0	0	1	0	0	0	0	0	0	0	0	0	0	0	0
	Chr6	1	0	0	0	1	0	0	0	0	1	0	0	0	1	0	0	0	0	0	0	0	0	0	0	0	0
	Chr7	1	0	0	0	1	0	0	0	0	1	0	0	0	1	0	0	0	0	0	0	0	0	0	0	0	0
	ChrR	1	0	0	0	1	0	0	0	0	1	0	0	0	1	0	0	0	0	1	0	0	1	0	0	0	0
	Total	6	2	2	0	4	0	0	1	0	3	0	0	0	4	0	10	8	2	15	2	8	1	0	0	0	1
D2M1	Chr1	1	0	0	0	1	0	1	0	0	0	0	0	0	1	0	10	10	0	13	1	9	0	0	0	0	1
N=11	Chr2	0	0	0	0	0	0	0	0	0	0	0	0	0	0	0	0	0	0	0	0	0	0	0	0	0	0
	Chr3	0	0	0	0	0	0	0	0	0	0	0	0	0	0	0	0	0	0	0	0	0	0	0	0	0	0
	Chr4	1	0	0	0	1	0	0	1	0	0	0	0	0	1	0	0	0	0	1	0	0	1	0	0	0	0
	Chr5	1	0	0	0	1	0	0	0	0	1	0	0	0	1	0	0	0	0	0	0	0	0	0	0	0	0
	Chr6	1	0	0	0	1	0	0	0	0	1	0	0	0	0	1	0	0	0	0	0	0	0	0	0	0	0
	Chr7	1	0	0	0	1	0	0	1	0	0	0	0	0	1	0	0	0	0	0	0	0	0	0	0	0	0
	ChrR	2	1	1	0	1	0	0	0	0	1	0	0	0	1	0	1	0	1	2	0	1	0	0	0	1	0
D2M5	Chr1	0	0	0	0	0	0	0	0	0	0	0	0	0	0	0	11	10	1	13	2	9	0	0	0	0	0
N=9	Chr2	0	0	0	0	0	0	0	0	0	0	0	0	0	0	0	0	0	0	0	0	0	0	0	0	0	0
	Chr3	0	0	0	0	0	0	0	0	0	0	0	0	0	0	0	0	0	0	0	0	0	0	0	0	0	0
	Chr4	1	0	0	0	1	0	0	0	0	1	0	0	0	1	0	0	0	0	0	0	0	0	0	0	0	0
	Chr5	0	0	0	0	0	0	0	0	0	0	0	0	0	0	0	0	0	0	0	0	0	0	0	0	0	0
	Chr6	2	2	2	0	0	0	0	0	0	0	0	0	0	0	0	0	0	0	0	0	0	0	0	0	0	0
	Chr7	0	0	0	0	0	0	0	0	0	0	0	0	0	0	0	0	0	0	0	0	0	0	0	0	0	0
	ChrR	3	1	1	0	2	0	0	2	0	0	0	0	0	2	0	0	0	0	1	0	0	1	0	0	0	0
D3M4	Chr1	2	2	2	0	0	0	0	0	0	0	0	0	0	0	0	5	4	1	6	2	3	0	0	0	0	0
N=28	Chr2	0	0	0	0	0	0	0	0	0	0	0	0	0	0	0	0	0	0	0	0	0	0	0	0	0	0
	Chr3	1	1	0	1	0	0	0	0	0	0	0	0	0	0	0	0	0	0	0	0	0	0	0	0	0	0
	Chr4	1	0	0	0	1	0	0	1	0	0	0	0	0	1	0	0	0	0	0	0	0	0	0	0	0	0
	Chr5	1	0	0	0	1	0	0	1	0	0	0	0	0	1	0	0	0	0	0	0	0	0	0	0	0	0
	Chr6	2	0	0	0	2	0	0	0	0	2	0	0	0	1	1	1	0	1	1	0	1	0	0	0	0	0
	Chr7	0	0	0	0	0	0	0	0	0	0	0	0	0	0	0	0	0	0	0	0	0	0	0	0	0	0
	ChrR	1	0	0	0	1	0	0	0	0	1	0	0	0	1	0	2	2	0	2	0	2	0	0	0	0	0
D5M1	Chr1	1	1	1	0	0	0	0	0	0	0	0	0	0	0	0	5	5	0	6	1	4	0	0	0	0	0
N=8	Chr2	1	1	0	1	0	0	0	0	0	0	0	0	0	0	0	0	0	0	0	0	0	0	0	0	0	0
	Chr3	2	2	0	2	0	0	0	0	0	0	0	0	0	0	0	0	0	0	0	0	0	0	0	0	0	0
	Chr4	1	1	1	0	0	0	0	0	0	0	0	0	0	0	0	0	0	0	0	0	0	0	0	0	0	0
	Chr5	1	0	0	0	1	0	0	0	0	1	0	0	0	1	0	0	0	0	0	0	0	0	0	0	0	0
	Chr6	1	0	0	0	1	0	0	0	0	1	0	0	0	1	0	0	0	0	0	0	0	0	0	0	0	0
	Chr7	1	1	1	0	0	0	0	0	0	0	0	0	0	0	0	0	0	0	0	0	0	0	0	0	0	0
	ChrR	2	2	2	0	0	0	0	0	0	0	0	0	0	0	0	0	0	0	0	0	0	0	0	0	0	0
D5M5	Chr1	7	3	3	0	4	3	1	0	0	0	0	0	3	1	0	6	6	0	7	1	5	0	0	0	0	0
N=25	Chr2	4	1	0	1	3	2	0	0	0	0	0	1	3	0	0	0	0	0	0	0	0	0	0	0	0	0
	Chr3	5	2	1	1	3	0	0	0	0	0	0	3	3	0	0	0	0	0	0	0	0	0	0	0	0	0
	Chr4	4	1	1	0	3	3	0	0	0	0	0	0	3	0	0	0	0	0	0	0	0	0	0	0	0	0
	Chr5	5	1	1	0	4	1	0	1	0	1	0	1	2	2	0	0	0	0	0	0	0	0	0	0	0	0
	Chr6	2	0	0	0	2	1	0	0	1	0	0	0	1	0	1	0	0	0	0	0	0	0	0	0	0	0
	Chr7	2	0	0	0	2	1	0	0	0	1	0	0	1	1	0	0	0	0	0	0	0	0	0	0	0	0
	ChrR	7	3	1	2	4	3	0	0	0	1	0	0	3	1	0	0	0	0	2	1	0	0	0	0	0	0
the first column shows the mouse ID and the number of strains analyzed. For information on population composition (2DOG selected or not) see Table S3
Chr - chromosome
LOH - Loss of heterozygosity
XO - crossover
SGM - segmental
GC - gene conversion
BIR - break-induced replication
Note: This is a summary of all data (not clone corrected)
